# Supplementary material for: Development of an Inactivated Vaccine against SARS CoV-2
Source: MDPI journal article supplement (doi:10.3390/vaccines9111266), 2021-11-02
Supplement: s1 [file s1]

## Supplementary

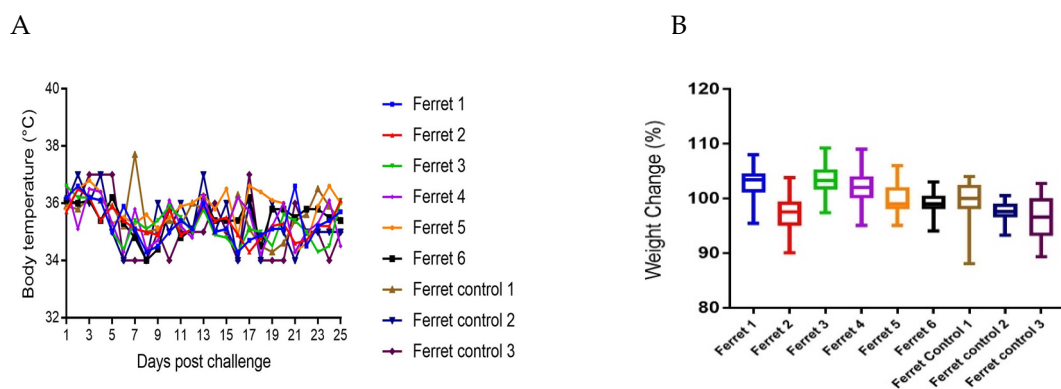

**Figure S1.** Body temperature and body weight were recorded in ferrets every 2 days when administered N+1 (6 ugr Ag and Alhydrogel) dose regimen. Control animals received N+1 saline buffer. There were no obvious body temperatures and body weight changes during this period in all animals.

### Negative control group 6 ugr dose group

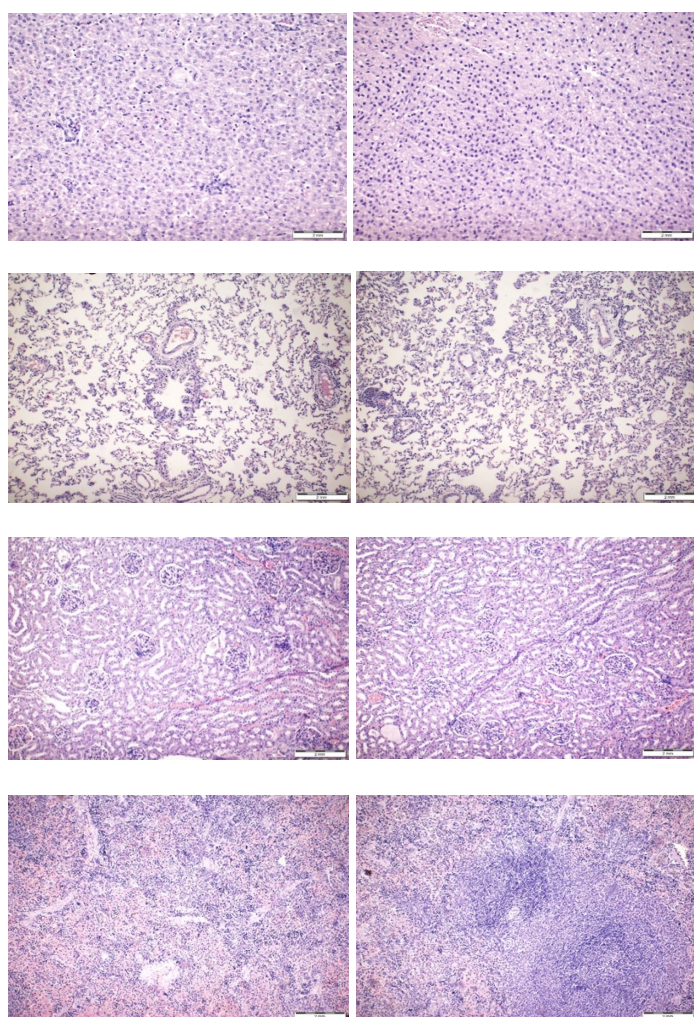

**Figure S2.** Representative Hematoxylin and Eosin-stained liver (A), lung (B), kidney (C) and spleen (D) tissues from ferrets, when administered with saline buffer and adjuvanted vaccine (6 ugr Ag and Alhydrogel). There were no pathological changes in these main organs. Scale bar is 2 mm, HE ×100.

**Table S1:** List of detected variants in hCoV-19/Turkey/ERAGEM-001/2020 strain in Passage 3 (P3) and Passage 10 (P10) compared to the MN908947.3 reference genome of a SARS-CoV-2 Wuhan isolate. Comparison of hCoV-19/Turkey/ERAGEM-001/2020 strain and the MN908947.3 reference genome of a SARS-CoV-2 Wuhan isolate was published from our group (see ref. [24]).

| Pos   | Gene   | Ref | P3 | P10 | AAPos | RefAA | P3AA | P10AA | Depth | VF(%) * |
|-------|--------|-----|----|-----|-------|-------|------|-------|-------|---------|
| 1397  | ORF1ab | G   | A  | A   | 378   | Val   | Ile  | Ile   | 45501 | 99.6    |
| 11083 | ORF1ab | G   | T  | T   | 3606  | Leu   | Leu  | Leu   | 17037 | 72.3    |
| 22213 | S      | T   | T  | C   | 217   | Pro   | Pro  | Pro   | 9952  | 64.7    |
| 23876 | S      | G   | A  | A   | 772   | Val   | Ile  | Ile   | 21239 | 99.9    |
| 28688 | N      | T   | C  | C   | 139   | Leu   | Leu  | Leu   | 35885 | 99.7    |
| 29563 | ORF10  | C   | T  | T   | 2     | Gly   | Gly  | Gly   | 55600 | 99.4    |
| 29742 | 3'UTR  | G   | T  | T   | -     | -     | -    | -     | 78352 | 99.7    |

\* VF(%): Variant fraction
